# Supplementary material
Source: PubMed Central journal article supplement (PMC6689306)
Supplement: JB.00303-19-s0002.pdf [file JB.00303-19-s0002.pdf]

**Supplementary Table S3.** Proteins differently expressed in stationary phase  $\Delta tonB_m$  strain compared to wild-type

| gene                                           | protein        | function                                            | localization | $\Delta tonB_m/wt$ |
|------------------------------------------------|----------------|-----------------------------------------------------|--------------|--------------------|
| <b>Transport and secretion</b>                 |                |                                                     |              |                    |
| <b>PP_0268*</b>                                | <b>OprQ</b>    | porin (OprD family porin)                           | OM           | 0.49               |
| <b>PP_0883*</b>                                | <b>OpdP</b>    | porin (OprD family porin)                           | OM           | 0.38               |
| PP_0861                                        | PP_0861        | outer membrane ferric siderophore receptor          | OM           | 2.38 <sup>i</sup>  |
| PP_2817 <sup>a</sup>                           | MexC           | multidrug efflux RND membrane fusion protein        | IM           | 0.05               |
| PP_2818 <sup>a</sup>                           | MexD           | multidrug efflux RND transporter                    | IM           | 0.01 <sup>i</sup>  |
| PP_2819 <sup>a</sup>                           | OprJ           | outer membrane protein                              | OM           | 0.01 <sup>i</sup>  |
| PP_3271                                        | PhaK           | porin (OprD family porin)                           | OM           | 0.11 <sup>i</sup>  |
| PP_3390                                        | PP_3390        | porin                                               | OM           | 0.31 <sup>i</sup>  |
| <b>PP_4519*</b>                                | <b>ToIC</b>    | ToIC family type I secretion outer membrane protein | OM           | 0.32               |
| <b>Signalling and transcription regulation</b> |                |                                                     |              |                    |
| PP_3286                                        | PhaN           | PaaX family transcriptional regulator               | C            | 3.57 <sup>i</sup>  |
| PP_2901                                        | PvdQ           | acyl-homoserine lactone acylase                     | P            | 0.37 <sup>i</sup>  |
| <b>Hypothetical and unknown function</b>       |                |                                                     |              |                    |
| PP_0765*                                       | PP_0765        | hypothetical protein                                | OM           | 0.17               |
| PP_2170                                        | PP_2170        | chorismate mutase                                   | Unknown      | 0.18 <sup>i</sup>  |
| <b>PP_4978*</b>                                | <b>PP_4978</b> | hypothetical protein                                | IM           | 6.25 <sup>i</sup>  |
| PP_5298                                        | PP_5298        | glutamine amidotransferase                          | Unknown      | 2.39 <sup>i</sup>  |

Gene and protein name in bold indicates that the protein was differentially expressed in ZnSO<sub>4</sub> treated *colR*-deficient strain as well.

<sup>a</sup> indicates that the genes are in the same operon.

\* indicates that the protein is differently expressed also in exponentially growing  $\Delta tonB_m$  strain compared to wild-type.

<sup>i</sup> marks that all the expression values of one strain that were used to calculate the  $\Delta tonB_m/wt$  difference were imputed.

Grey values represent ON-OFF differences that are not statistically significant.

**Supplementary Table S4. Proteins differently expressed in exponentially growing *ΔtonB<sub>m</sub>* strain compared to wild-type**

| gene                               | protein        | function                                            | localization  | <i>ΔtonB<sub>m</sub></i> /wt |
|------------------------------------|----------------|-----------------------------------------------------|---------------|------------------------------|
| <b>Transport and secretion</b>     |                |                                                     |               |                              |
| PP_0101 <sup>U</sup>               | PP_0101        | sulfate transporter                                 | IM            | 26.23 <sup>i</sup>           |
| <b>PP_0268</b>                     | <b>OprQ</b>    | porin                                               | OM            | 0.44                         |
| <b>PP_0504</b>                     | <b>OprG</b>    | OmpW family protein                                 | OM            | 0.32                         |
| <b>PP_0773<sup>U</sup></b>         | <b>PP_0773</b> | OmpA/MotB domain-containing protein                 | OM            | 3.91                         |
| <b>PP_0882<sup>a</sup></b>         | <b>DppA</b>    | peptide ABC transporter substrate-binding protein   | P             | 0.46                         |
| <b>PP_0883<sup>a</sup></b>         | <b>PP_0883</b> | porin                                               | OM            | 0.41                         |
| <b>PP_1141<sup>U</sup></b>         | <b>BraC</b>    | ABC transporter substrate-binding protein           | P             | 0.48                         |
| <b>PP_1378</b>                     | <b>PcaT</b>    | metabolite/H <sup>+</sup> symporter                 | IM            | +/- <sup>o</sup>             |
| PP_1400                            | KgtP           | metabolite/H <sup>+</sup> symporter                 | IM            | 0.21                         |
| PP_1445                            | OprB-II        | carbohydrate-selective porin                        | OM            | 0.41 <sup>i</sup>            |
| PP_2659                            | PstB1          | phosphate ABC transporter ATP-binding protein       | IM            | 4.65 <sup>i</sup>            |
| <b>PP_3088<sup>b</sup></b>         | <b>TssA1</b>   | K1-T6SS core component                              | C             | 3.28                         |
| PP_3089 <sup>b</sup>               | Hcp1           | K1-T6SS core component                              | Extracellular | 2.41                         |
| <b>PP_3091<sup>b</sup></b>         | <b>TssM1</b>   | K1-T6SS core component                              | IM            | 16.27                        |
| <b>PP_3093<sup>b</sup></b>         | <b>TssK1</b>   | K1-T6SS core component                              | C             | 7.02                         |
| <b>PP_3092<sup>b</sup></b>         | <b>TssL</b>    | K1-T6SS core component                              | C             | 8.89                         |
| <b>PP_3094<sup>b</sup></b>         | <b>TssJ1</b>   | K1-T6SS core component                              | IM            | 2.86                         |
| <b>PP_3095<sup>b</sup></b>         | <b>ClpV1</b>   | K1-T6SS core component, ATPase                      | C             | 5.04                         |
| <b>PP_3097<sup>Ub</sup></b>        | <b>TssF1</b>   | K1-T6SS core component                              | C             | 6.07                         |
| <b>PP_3099<sup>b</sup></b>         | <b>TssC1</b>   | K1-T6SS core component                              | C             | 4.89                         |
| <b>PP_3100<sup>b</sup></b>         | <b>TssB1</b>   | K1-T6SS core component                              | C             | 5.18                         |
| PP_3155                            | PP_3155        | ferric siderophore receptor                         | OM            | 0.26                         |
| PP_4217                            | FpvA           | ferripyoverdine receptor                            | OM            | 0.27                         |
| <b>PP_4519</b>                     | <b>TolC</b>    | TolC family type I secretion outer membrane protein | OM            | 0.50                         |
| PP_4613                            | FecA           | iron(III) dicitrate receptor                        | OM            | 0.34                         |
| PP_4735 <sup>c</sup>               | LctP           | L-lactate transport                                 | IM            | 0.46                         |
| <b>PP_4838</b>                     | <b>OprC</b>    | TonB-dependent copper receptor                      | OM            | 0.47                         |
| PP_4864                            | BraF           | amino acid ABC transporter ATP-binding protein      | IM            | 6.69 <sup>i</sup>            |
| PP_5329                            | PstS           | phosphate ABC transporter substrate-binding protein | IM            | 3.52                         |
| <b>Stress and defence response</b> |                |                                                     |               |                              |
| <b>PP_0089<sup>U</sup></b>         | <b>OsmC</b>    | OsmC family protein                                 | C             | 3.52 <sup>i</sup>            |
| PP_0235                            | LsfA           | peroxidase                                          | C             | 3.30                         |
| <b>PP_0946<sup>d</sup></b>         | <b>SodA</b>    | superoxide dismutase                                | P             | 12.84                        |
| <b>PP_1277<sup>U</sup></b>         | <b>AlgA</b>    | mannose-1-phosphate guanylyltransferase             | C             | 6.93 <sup>i</sup>            |
| <b>PP_1286<sup>Ue</sup></b>        | <b>Alg44</b>   | long-chain fatty acid-CoA ligase                    | P             | 2.94 <sup>i</sup>            |
| <b>PP_1288<sup>Ue</sup></b>        | <b>AlgD</b>    | GDP-mannose 6-dehydrogenase                         | C             | 26.32 <sup>i</sup>           |
| <b>PP_1502<sup>f</sup></b>         | <b>LptF</b>    | OmpA/MotB domain-containing protein                 | OM            | 7.14                         |
| <b>PP_1749<sup>Ug</sup></b>        | <b>PP_1749</b> | acetyltransferase                                   | C             | 2.89 <sup>i</sup>            |
| PP_3822                            | PP_3822        | cytochrome c family protein                         | P             | 0.15                         |
| PP_4812 <sup>U</sup>               | PP_4812        | 3-methyladenine DNA glycosylase                     | C             | 2.46                         |
| <b>PP_4855<sup>U</sup></b>         | <b>OsmE</b>    | Osmotically-inducible lipoprotein                   | OM            | 4.80 <sup>i</sup>            |
| PP_5151                            | CarP           | SdiA-regulated domain-containing protein            | C             | 15.78 <sup>i</sup>           |
| <b>PP_5288<sup>U</sup></b>         | <b>AlgC</b>    | phosphomannomutase                                  | C             | 2.86                         |
| <b>Cell envelope homeostasis</b>   |                |                                                     |               |                              |
| PP_3135                            | WapB           | 1,2-glucosyltransferase                             | C             | 6.41                         |

|                                                |                |                                                      |         |                    |
|------------------------------------------------|----------------|------------------------------------------------------|---------|--------------------|
| <b>PP_4032<sup>u</sup></b>                     | <b>PP_4032</b> | outer membrane lipoprotein Blc                       | OM      | 3.41               |
| <b>PP_5037<sup>h</sup></b>                     | <b>PP_5037</b> | outer membrane lipoprotein Blc                       | OM      | 6.40               |
| <b>Signalling and transcription regulation</b> |                |                                                      |         |                    |
| PP_0185 <sup>u</sup>                           | PprA           | LytTR family two component transcriptional regulator | C       | 5.32               |
| <b>PP_0216<sup>u</sup></b>                     | <b>PP_0216</b> | PAS/PAC sensor containing diguanylate cyclase        | C       | 5.22 <sup>i</sup>  |
| PP_0769                                        | PP_0769        | histidine kinase                                     | C       | 0.47               |
| PP_1652                                        | PfeS-II        | histidine kinase                                     | IM      | 2.91 <sup>i</sup>  |
| PP_2347                                        | CarR           | two component transcriptional regulator              | C       | 4.38               |
| PP_2900                                        | PP_2900        | probable Fur like regulator                          | C       | 2.65               |
| <b>PP_3631<sup>u</sup></b>                     | <b>HtrG</b>    | putative signal transduction protein                 | Unknown | 7.10               |
| PP_4224                                        | PP_4224        | membrane sensor signal transduction histidine kinase | IM      | 10.24 <sup>i</sup> |
| <b>PP_4470<sup>u</sup></b>                     | <b>AmrZ</b>    | alginate biosynthesis regulator AlgZ                 | C       | 5.83               |
| PP_5320                                        | PhoB           | transcriptional regulator                            | C       | 7.01               |
| <b>Amino acid and protein metabolism</b>       |                |                                                      |         |                    |
| PP_0675                                        | GdhA           | glutamate dehydrogenase                              | Unknown | 2.20               |
| PP_0988 <sup>u</sup>                           | GcvP1          | glycine dehydrogenase                                | C       | 0.28               |
| <b>PP_1750<sup>ug</sup></b>                    | <b>AsnB</b>    | asparagine synthetase                                | C       | 3.25 <sup>i</sup>  |
| PP_3664                                        | PssA-1         | phosphatidylserine synthase                          | C       | 2.12               |
| <b>PP_3796</b>                                 | <b>PvdA</b>    | L-ornithine 5-oxygenase PvdA                         | C       | 4.77               |
| PP_4209                                        | PvdR           | ABC transporter permease                             | IM      | 4.84 <sup>i</sup>  |
| PP_4213                                        | PvdM           | dipeptidase                                          | Unknown | 2.40               |
| <b>PP_4216</b>                                 | <b>PvdE</b>    | cyclic peptide transporter                           | IM      | 6.75               |
| <b>PP_4218<sup>i</sup></b>                     | <b>PP_4218</b> | lipase/esterase                                      | C       | 2.82               |
| <b>PP_4219<sup>i</sup></b>                     | <b>PvdD</b>    | non-ribosomal peptide synthetase                     | Unknown | 4.33               |
| <b>PP_4220<sup>j</sup></b>                     | <b>PvdJ</b>    | non-ribosomal peptide synthetase                     | Unknown | 3.09               |
| <b>PP_4221<sup>j</sup></b>                     | <b>PvdI</b>    | non-ribosomal peptide synthetase                     | Unknown | 6.24               |
| <b>PP_4222</b>                                 | <b>SyrP</b>    | aspartyl hydroxylase                                 | C       | 5.68               |
| <b>PP_4223</b>                                 | <b>PvdH</b>    | diaminobutyrate-2-oxoglutarate aminotransferase      | C       | 4.82               |
| <b>PP_4243</b>                                 | <b>PvdL</b>    | peptide synthase PvdL                                | Unknown | 5.50               |
| PP_4245                                        | PvdY           | siderophore biosynthesis protein                     | C       | 4.69               |
| PP_4621                                        | HmgA           | homogentisate 1,2-dioxygenase                        | Unknown | 2.04               |
| <b>Metabolism</b>                              |                |                                                      |         |                    |
| <b>PP_0100<sup>u</sup></b>                     | <b>CynT</b>    | carbonate dehydratase                                | C       | 5.33               |
| PP_0236 <sup>k</sup>                           | SsuE           | NAD(P)H-dependent FMN reductase                      | Unknown | 2.64 <sup>i</sup>  |
| PP_0238 <sup>k</sup>                           | SsuD           | alkanesulfonate monooxygenase                        | C       | 12.49 <sup>i</sup> |
| PP_0543                                        | EutB           | ethanolamine ammonia-lyase subunit alpha             | C       | 3.50               |
| <b>PP_0944<sup>d</sup></b>                     | <b>FumC-1</b>  | fumarate hydratase                                   | C       | 18.60              |
| PP_1755                                        | FumC-2         | fumarate hydratase                                   | C       | 2.50               |
| PP_2136 <sup>u</sup>                           | FadB           | multifunctional fatty acid oxidation complex subunit | C       | 2.71               |
| PP_2137                                        | FadA           | 3-ketoacyl-CoA thiolase                              | C       | 2.56               |
| PP_2168 <sup>u</sup>                           | Tal            | transaldolase B                                      | Unknown | 2.073              |
| PP_2437                                        | PP_2437        | acyl-CoA dehydrogenase                               | C       | 10.36 <sup>i</sup> |
| PP_3443                                        | PP_3443        | glyceraldehyde-3-phosphate dehydrogenase             | C       | 2.14               |
| PP_4043                                        | GntZ           | 6-phosphogluconate dehydrogenase                     | C       | 2.16               |
| PP_4058                                        | GlgB           | glycogen branching protein                           | C       | 2.01               |
| PP_4060                                        | GlgE           | alpha-amylase                                        | C       | 4.53               |
| PP_4264                                        | HemN           | coproporphyrinogen III oxidase                       | C       | 0.24               |
| PP_4736 <sup>l</sup>                           | LldD           | L-lactate dehydrogenase                              | C       | 0.39               |
| PP_4737 <sup>l</sup>                           | Dld2           | D-lactate dehydrogenase                              | C       | 0.12               |
| PP_4870                                        | PP_4870        | azurin                                               | P       | 0.36               |

|                                          |                |                                               |               |                    |
|------------------------------------------|----------------|-----------------------------------------------|---------------|--------------------|
| PP_5041                                  | GlgP           | glycogen/starch/alpha-glucan phosphorylase    | C             | 2.84               |
| PP_5210                                  | PP_5210        | zinc-containing alcohol dehydrogenase         | C             | 6.60 <sup>i</sup>  |
| PP_5222                                  | CyaA           | adenylate cyclase                             | C             | 2.61 <sup>i</sup>  |
| PP_5365                                  | PP_5365        | cyclopropane-fatty-acyl-phospholipid synthase | C             | 2.55               |
| <b>Chemotaxis and motility</b>           |                |                                               |               |                    |
| <b>PP_1087</b>                           | <b>MotY</b>    | Flagellar protein MotY precursor signature    | OM            | 0.50               |
| <b>PP_4377</b>                           | <b>FlaG</b>    | flagellin                                     | Unknown       | 0.44               |
| <b>Hypothetical and unknown function</b> |                |                                               |               |                    |
| PP_0052                                  | PP_0052        | beta-lactamase domain-containing protein      | C             | 3.21               |
| <b>PP_0085</b>                           | <b>PP_0085</b> | hypothetical protein                          | Unknown       | 11.86 <sup>i</sup> |
| PP_0128                                  | PP_0128        | hypothetical protein                          | C             | 2.26 <sup>i</sup>  |
| PP_0255                                  | PP_0255        | hypothetical protein                          | IM            | 8.40               |
| PP_0541                                  | PP_0541        | acetyltransferase                             | C             | 2.35               |
| PP_0765                                  | PP_0765        | hypothetical protein                          | OM            | 0.31               |
| <b>PP_0837<sup>U</sup></b>               | <b>YcfJ</b>    | hypothetical protein                          | OM            | 5.42               |
| <b>PP_0886</b>                           | <b>PP_0886</b> | hypothetical protein                          | P             | 3.38               |
| <b>PP_0903<sup>U</sup></b>               | <b>PP_0903</b> | type 11 methyltransferase                     | C             | 11.37 <sup>i</sup> |
| PP_0945 <sup>d</sup>                     | PP_0945        | hypothetical protein                          | C             | 18.79              |
| PP_1291                                  | PP_1291        | PhoH family protein                           | C             | 4.07               |
| PP_1478 <sup>U</sup>                     | PP_1478        | NADH:flavin oxidoreductase                    | C             | 2.27               |
| PP_1487 <sup>U</sup>                     | PP_1487        | hypothetical protein                          | IM            | 2.43               |
| <b>PP_1503<sup>Uf</sup></b>              | <b>PP_1503</b> | hypothetical protein                          | Unknown       | 6.10               |
| <b>PP_1659</b>                           | <b>PP_1659</b> | hypothetical protein                          | P             | 0.29               |
| PP_1838                                  | PP_1838        | hypothetical protein                          | IM            | 2.26               |
| <b>PP_2059</b>                           | <b>PP_2059</b> | CsbD family protein                           | Unknown       | 12.59 <sup>i</sup> |
| PP_2103                                  | PP_2103        | hypothetical protein                          | Unknown       | 2.22 <sup>i</sup>  |
| PP_2132                                  | PP_2132        | universal stress protein                      | C             | 2.23               |
| PP_2172 <sup>U</sup>                     | PP_2172        | hypothetical protein                          | Extracellular | 2.21               |
| PP_2306 <sup>Um</sup>                    | PP_2306        | lipoprotein                                   | Unknown       | 2.66               |
| PP_2307 <sup>m</sup>                     | PP_2307        | CHAD domain-containing protein                | C             | 2.85               |
| PP_2356                                  | PP_2356        | phytochrome family protein                    | IM            | 2.12               |
| <b>PP_2891</b>                           | <b>PP_2891</b> | acetyltransferase                             | IM            | 3.12 <sup>i</sup>  |
| <b>PP_3824</b>                           | <b>PP_3824</b> | hypothetical protein                          | Unknown       | 3.25               |
| PP_3930                                  | PP_3930        | hypothetical protein                          | IM            | 4.05               |
| <b>PP_4920<sup>U</sup></b>               | <b>PP_4920</b> | lipoprotein                                   | Unknown       | 3.14               |
| <b>PP_4978</b>                           | <b>PP_4978</b> | hypothetical protein                          | IM            | 8.93               |
| <b>PP_5038<sup>Uh</sup></b>              | <b>PP_5038</b> | hypothetical protein                          | Unknown       | 53.06 <sup>i</sup> |
| PP_5252                                  | PP_5252        | amidohydrolase                                | Unknown       | 2.01               |

Gene and protein name in bold indicates that the protein was differentially expressed in ZnSO<sub>4</sub> treated *colR*-deficient strain as well.

<sup>a-m</sup> indicates that the genes are in the same operon.

<sup>U</sup> shows that the gene belongs to AlgU regulon.

<sup>i</sup> marks that all the expression values of one strain that were used to calculate the  $\Delta tonB_m/wt$  difference were imputed.

Grey values represent ON-OFF differences that are not statistically significant.

<sup>o</sup> +/- indicates that protein was detected in  $\Delta tonB_m$  but not in wt.  $\Delta tonB_m/wt$  ratio is not presented because imputation of missing values for wild-type resulted in higher values than determined for  $\Delta tonB_m$ .

**Supplementary Table S5. Oligonucleotides**

| Name          | Sequence (5'-3') <sup>a</sup>            | Use                                                          |
|---------------|------------------------------------------|--------------------------------------------------------------|
| 4994Bam       | <u>aaggatc</u> ctggaaccctgacc            | construction of pEMG/ $\Delta$ tonB <sub>m</sub>             |
| 4994pikk      | agttactggacaaacgggtcccaggtatccagcaaccgca | construction of pEMG/ $\Delta$ tonB <sub>m</sub>             |
| 4994del       | ggaccgtttgtccagtaact                     | construction of pEMG/ $\Delta$ tonB <sub>m</sub>             |
| 4994Eco       | <u>aagaattc</u> agccaggcgttgcgg          | construction of pEMG/ $\Delta$ tonB <sub>m</sub>             |
| 1898Xba       | <u>cgctagagc</u> agtaatgaccgttc          | construction of pEMG/ $\Delta$ pocA and pEMG/ $\Delta$ pocAB |
| pocAuus       | gcagcatcatccaaccacc                      | construction of pEMG/ $\Delta$ pocA and pEMG/ $\Delta$ pocAB |
| pocA-pikk-uus | gggtggttgatgatgctgccgatcaagctggtggaagt   | construction of pEMG/ $\Delta$ pocA                          |
| 1899Eco       | <u>ccgaattc</u> gcacaggatcaggctag        | construction of pEMG/ $\Delta$ pocA                          |
| 1898Xba       | <u>cgctagagc</u> agtaatgaccgttc          | construction of pEMG/ $\Delta$ pocB                          |
| 1899algius    | Aacttcacgccttcctcc                       | construction of pEMG/ $\Delta$ pocB                          |
| 1899stop_pikk | ggaggcaaggcgtgaagttagggcacgccttgatggct   | construction of pEMG/ $\Delta$ pocB                          |
| 1899Eco       | <u>ccgaattc</u> gcacaggatcaggctag        | construction of pEMG/ $\Delta$ pocB and pEMG/ $\Delta$ pocAB |
| pocBstop-uus  | gggtggttgatgatgctgcaggcgcacgccttgatggc   | construction of pEMG/ $\Delta$ pocAB                         |
| XbaIflhF      | <u>attctagaagc</u> tgaccacagagtc         | construction of pEMG/ $\Delta$ flhF                          |
| flhFpikk      | gatatgctgaggccatgctgctgatctctatca        | construction of pEMG/ $\Delta$ flhF                          |
| flhFalgus     | Catggcctgacgcatatc                       | construction of pEMG/ $\Delta$ flhF                          |
| flhFEcoRI     | <u>atgaattc</u> ggccacgaagaggt           | construction of pEMG/ $\Delta$ flhF                          |
| del_CDJEco    | <u>aggaattc</u> cagataaaaccgaggt         | construction of pEMG/ $\Delta$ mexCD- <i>oprJ</i>            |
| del_CDJ_pikk  | ggaggctgtttcagcccttatcgaaacctgtcttg      | construction of pEMG/ $\Delta$ mexCD- <i>oprJ</i>            |
| del_CDJ       | aagggtgaaaccgctcc                        | construction of pEMG/ $\Delta$ mexCD- <i>oprJ</i>            |
| del_CDJXba    | <u>attctaga</u> aagctatggggaccagg        | construction of pEMG/ $\Delta$ mexCD- <i>oprJ</i>            |
| 2820Eco       | <u>aagaattc</u> gacgggtgctcgta           | construction of pEMG/ $\Delta$ nfxB                          |
| 2820del       | tgcaaaccgctggagctgctt                    | construction of pEMG/ $\Delta$ nfxB                          |
| 2820pikk      | aagcagctccagcgtttgcatcagaagattccacac     | construction of pEMG/ $\Delta$ nfxB                          |
| 2820Sac       | <u>aagagctc</u> aaggcctcaccaga           | construction of pEMG/ $\Delta$ nfxB                          |
| oprB-1ees     | cagggtaccatctgccagtgcagtct               | verification of <i>oprB1</i> deficiency                      |
| oprB-1lopp    | tggtctagagctcttgtgtttgagat               | verification of <i>oprB1</i> deficiency                      |
| prtac         | aattaatcatcggtcgtataa                    | arbitrary PCR; verification of $P_{tac}$ -tonB <sub>m</sub>  |
| Arb6          | ggccacgcgtcactagtagtacnnnnnnnnnacgcc     | arbitrary PCR                                                |
| OEint         | Acttgtgtataagagtcag                      | arbitrary PCR                                                |
| Arb2          | ggccacgcgtcactagtagt                     | arbitrary PCR                                                |
| 4994alg       | <u>ccaagctt</u> atcagactgagctgctgcc      | construction of pBRIactac/tonB <sub>m</sub>                  |
| 4994lopp      | tcctctagatactccacaggcttcagc              | construction of pBRIactac/tonB <sub>m</sub>                  |
| flhFEco       | <u>aaagaattc</u> aagcaagtcaccatcgttg     | construction of pKTIactac/ <i>flhF-gfp</i>                   |
| flhFXho       | <u>aaactcgag</u> accgctcgcctgggtgt       | construction of pKTIactac/ <i>flhF-gfp</i>                   |

<sup>a</sup> The sites of restriction enzymes used in cloning are underlined.
